# Supplementary material for: High total-electrode and mass-specific capacitance cellulose nanocrystal-polypyrrole nanocomposites for supercapacitors
Source: Royal Society of Chemistry journal article supplement (doi:10.1039/c3ra41168k), 2013-01-01
Supplement: c3ra41168k.pdf [file c3ra41168k.pdf]

## High total-electrode and mass-specific capacitance cellulose nanocrystal-polypyrrole nanocomposites for supercapacitors

Soon Yee Liew,<sup>a</sup> Darren A. Walsh<sup>b\*</sup> and Wim Thielemans<sup>a\*</sup>

<sup>a</sup> Division of Process and Environmental Engineering, Faculty of Engineering

<sup>b</sup> School of Chemistry, The University of Nottingham, Nottingham NG7 2RD, UK

### Electronic Supporting Information

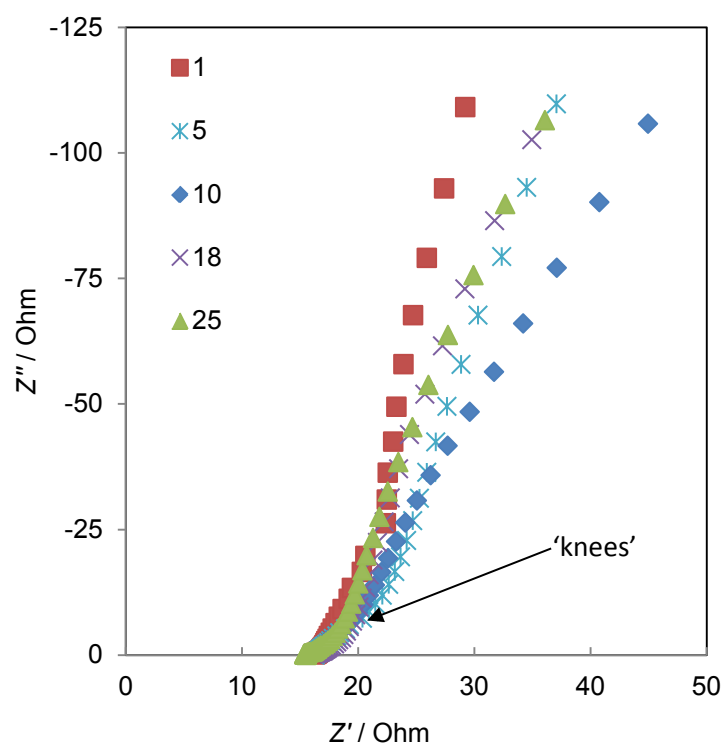

**Figure ESI- 1.** Nyquist plots obtained from EIS of PPY/CNXL films at 0.0 V vs Ag|AgCl in 2 M KCl. The potential amplitude was 5 mV and the film deposition charge densities (in units of  $\text{C cm}^{-2}$ ) were indicated in the graph. The arrow indicates the position where the 'knee' occurs for all the plots.
